# Supplementary material
Source: MDPI journal article supplement (https://www.mdpi.com/1999-4907/13/12/2184)
Supplement: s1 [file s1]

## Supplementary materials

Table S1. Species composition and dominant species of different vegetation community at Nanling Mountains

| Vegetation types                         | Altitudes | S  | $H'$ | $D$  | $E$  | Dominant species                                                                                                                            | Soil Type   |
|------------------------------------------|-----------|----|------|------|------|---------------------------------------------------------------------------------------------------------------------------------------------|-------------|
| Valley evergreen broad-leaved forest     | 413       | 37 | 2.76 | 0.90 | 0.76 | <i>Machilus kwangtungensis</i> , <i>Castanopsis lamontii</i> , <i>M. chinensis</i> , <i>Syzygium buxifolium</i> , <i>Lithocarpus glaber</i> | yellow soil |
|                                          | 421       | 47 | 2.83 | 0.90 | 0.74 | <i>M. kwangtungensis</i> , <i>S. buxifolium</i> , <i>Diospyros morrisia</i> , <i>L. glaber</i> , <i>L. harlandii</i>                        | yellow soil |
|                                          | 439       | 63 | 3.26 | 0.93 | 0.79 | <i>M. kwangtungensis</i> , <i>C. fordii</i> , <i>Exbucklandia tonkinensis</i> , <i>C. hystrix</i> , <i>C. lamontii</i>                      | yellow soil |
|                                          | 839       | 69 | 3.58 | 0.96 | 0.85 | <i>M. kwangtungensis</i> , <i>Cyclobalanopsis glauca</i> , <i>Castanopsis faberi</i> , <i>C. carlesii</i> , <i>Castanopsis lamontii</i>     | yellow soil |
|                                          | 842       | 59 | 3.53 | 0.96 | 0.86 | <i>Cyclobalanopsis glauca</i> , <i>M. kwangtungensis</i> , <i>Castanopsis faberi</i> , <i>C. carlesii</i>                                   | yellow soil |
|                                          | 843       | 73 | 3.93 | 0.98 | 0.92 | <i>C. uraiana</i> , <i>C. carlesii</i> , <i>Cyclobalanopsis myrsinifolia</i> , <i>Pinus massonia</i> , <i>L. glaber</i>                     | yellow soil |
| Mountain evergreen broad-leaved forest   | 918       | 46 | 2.87 | 0.91 | 0.75 | <i>Castanopsis eyrei</i> , <i>Fagus longipetiolata</i> , <i>Rhododendron simsii</i> , <i>Alniphyllum fortunei</i> , <i>M. chinensis</i>     | yellow soil |
|                                          | 920       | 39 | 2.72 | 0.90 | 0.74 | <i>C. eyrei</i> , <i>Fagus longipetiolata</i> , <i>Adindra millettii</i> , <i>R. simsii</i> , <i>Alniphyllum fortunei</i>                   | yellow soil |
|                                          | 925       | 59 | 3.25 | 0.94 | 0.80 | <i>C. carlesii</i> , <i>Exbucklandia tonkinensis</i> , <i>R. cavaleriei</i> , <i>Cunninghamia lanceolata</i> , <i>Elaeocarpus decipiens</i> | yellow soil |
|                                          | 1170      | 92 | 3.76 | 0.96 | 0.83 | <i>C. lamontii</i> , <i>C. faberi</i> , <i>Michelia maudiae</i> , <i>Cyclobalanopsis myrsinifolia</i> , <i>Cunninghamia lanceolata</i>      | yellow soil |
|                                          | 1182      | 61 | 3.41 | 0.96 | 0.83 | <i>Vernicia monta</i> , <i>Castanopsis faberi</i> , <i>C. carlesii</i> , <i>Liquidambar formosa</i> , <i>Manglietia fordia</i>              | yellow soil |
|                                          | 1205      | 73 | 3.71 | 0.96 | 0.87 | <i>Cyclobalanopsis glauca</i> , <i>Castanopsis eyrei</i> , <i>V. monta</i> , <i>Betula luminifera</i> , <i>C. fissa</i>                     | yellow soil |
| Coniferous and broad-leaved mixed forest | 1360      | 34 | 2.46 | 0.86 | 0.70 | <i>Pinus kwangtungensis</i> , <i>Schima spp</i> , <i>Cleyera japonica</i> , <i>Pentaphylax euryoides</i> , <i>Pinus massonia</i>            | yellow soil |
|                                          | 1360      | 70 | 3.48 | 0.95 | 0.82 | <i>Schima spp</i> , <i>P. kwangtungensis</i> , <i>Castanopsis eyrei</i> , <i>C. lamontii</i> , <i>Pentaphylax euryoides</i>                 | yellow soil |
|                                          | 1388      | 58 | 3.32 | 0.94 | 0.82 | <i>P. kwangtungensis</i> , <i>Castanopsis eyrei</i> , <i>Tsuga longibracteata</i> , <i>Pentaphylax euryoides</i>                            | yellow soil |
|                                          | 1398      | 61 | 3.34 | 0.95 | 0.81 | <i>Cyclobalanopsis glauca</i> , <i>Castanopsis eyrei</i> , <i>M. chinensis</i> , <i>B. luminifera</i> , <i>Michelia figo</i>                | yellow soil |
|                                          | 1504      | 57 | 2.93 | 0.88 | 0.72 | <i>Schima spp</i> , <i>P. kwangtungensis</i> , <i>M. kwangtungensis</i> , <i>P. massonia</i>                                                | yellow soil |
|                                          | 1517      | 61 | 3.50 | 0.95 | 0.85 | <i>T. longibracteata</i> , <i>P. kwangtungensis</i> , <i>C. faberi</i> , <i>R. cavaleriei</i>                                               | yellow soil |

|                         |      |    |      |      |      |                                                                                                                     |                              |
|-------------------------|------|----|------|------|------|---------------------------------------------------------------------------------------------------------------------|------------------------------|
| Mountain scrubby meadow | 1548 | 10 | 0.78 | 1.85 | 0.80 | <i>Miscanthus floridulus, Panicum psilopodium, Rubus setchuenensis, Melastoma dodecandrum, Hypericum seniavinii</i> | mountain scrubby-meadow soil |
|                         | 1545 | 7  | 0.57 | 1.29 | 0.66 | <i>Miscanthus floridulus, Microlepidia hancei, Panicum psilopodium, Melastoma dodecandrum,</i>                      | mountain scrubby-meadow soil |
|                         | 1541 | 7  | 0.50 | 1.16 | 0.60 | <i>Miscanthus floridulus, Microlepidia hancei, Dryopteris varia, Dicranopteris dichotoma, Callicarpa rubella</i>    | mountain scrubby-meadow soil |
|                         | 1687 | 38 | 2.83 | 0.90 | 0.78 | <i>Styrax japonicus, Cyclobalanopsis glauca, Illicium ternstroemioides, Ilex chinensis</i>                          | yellow soil                  |
| Mountain brushwoods     | 1691 | 37 | 2.79 | 0.91 | 0.77 | <i>C. glauca, S. japonicus, Cinnomum pauciflorum, Eurya japonica, Machilus kwangtungensis</i>                       | yellow soil                  |
|                         | 1698 | 53 | 2.80 | 0.90 | 0.70 | <i>S. japonicus, C. pauciflorum, C. glauca, I. chinensis</i>                                                        | yellow soil                  |

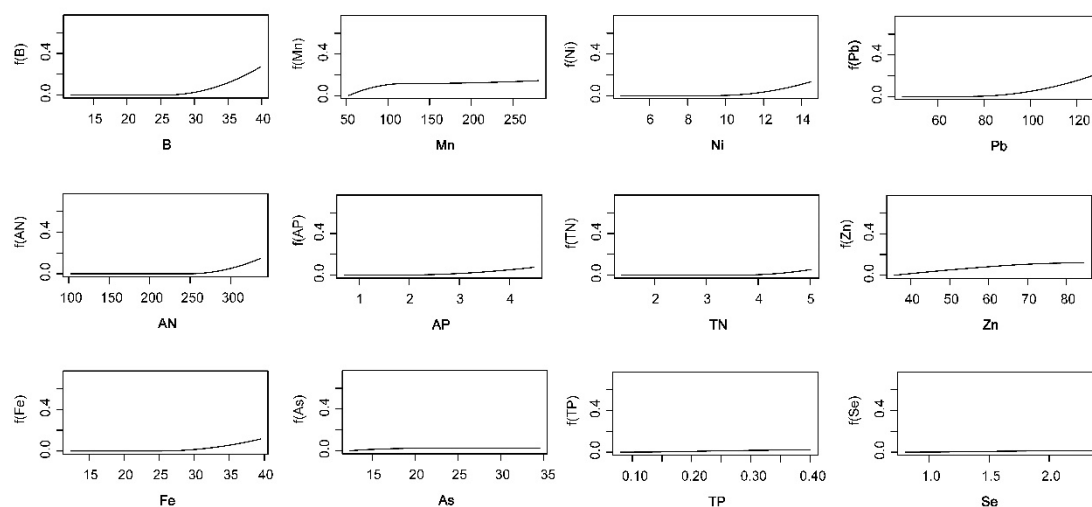

Figure S1. Partial response for 0-20 cm edaphic factors on trees' GDM.

Note: The codes and units of environmental factors referred to Table 1; The unit in x axis was original unit for the variables, the function  $f(\text{variable})$  in y axis indicated I-spline-transformed function, its unit was linking unit of community dissimilarity, i.e.,  $-\ln(1 - d_{ij})$ . The same below

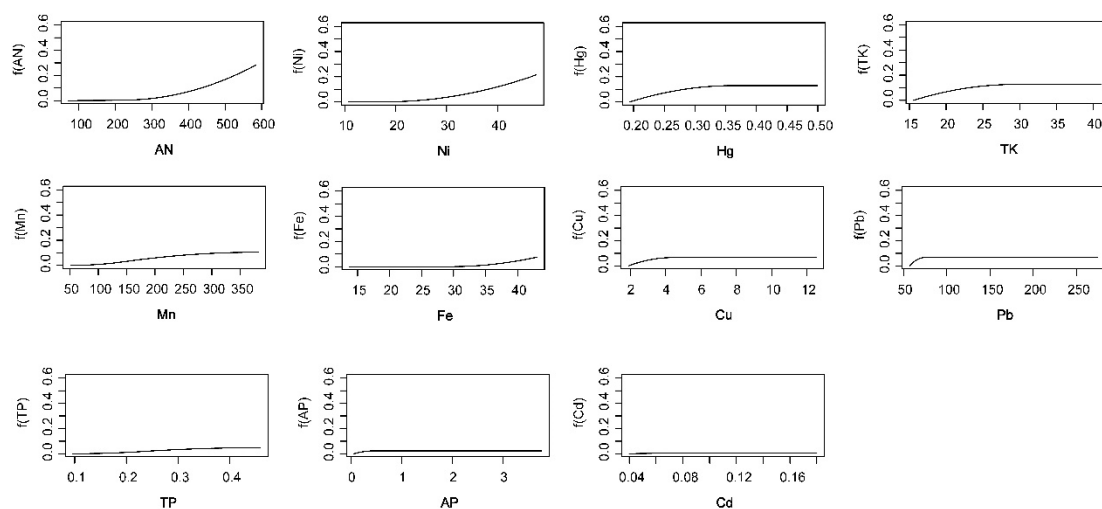

Figure S2. Partial response for 20-40 cm edaphic factors on trees' GDM.

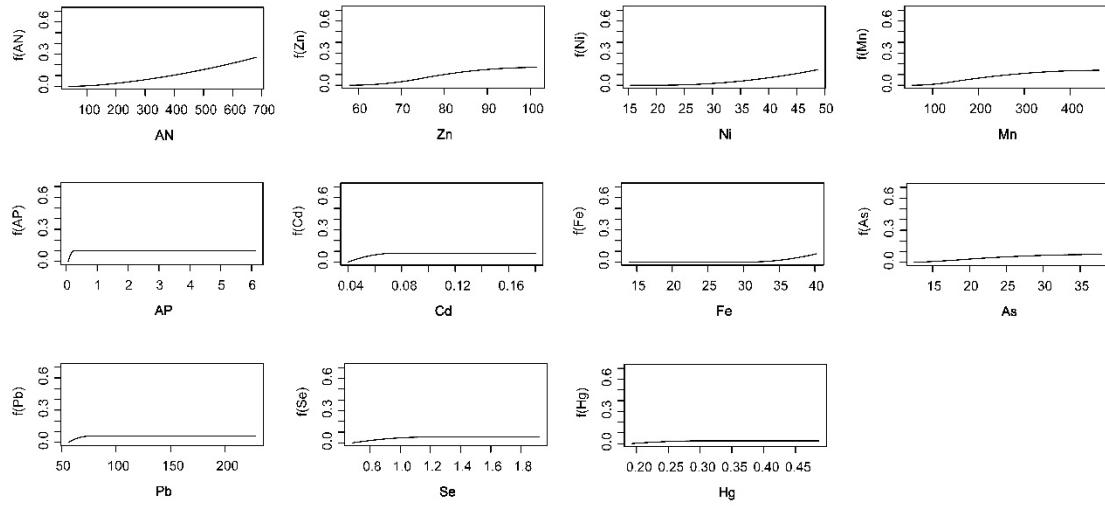

Figure S3. Partial response for 40-60 cm edaphic factors on trees' GDM.

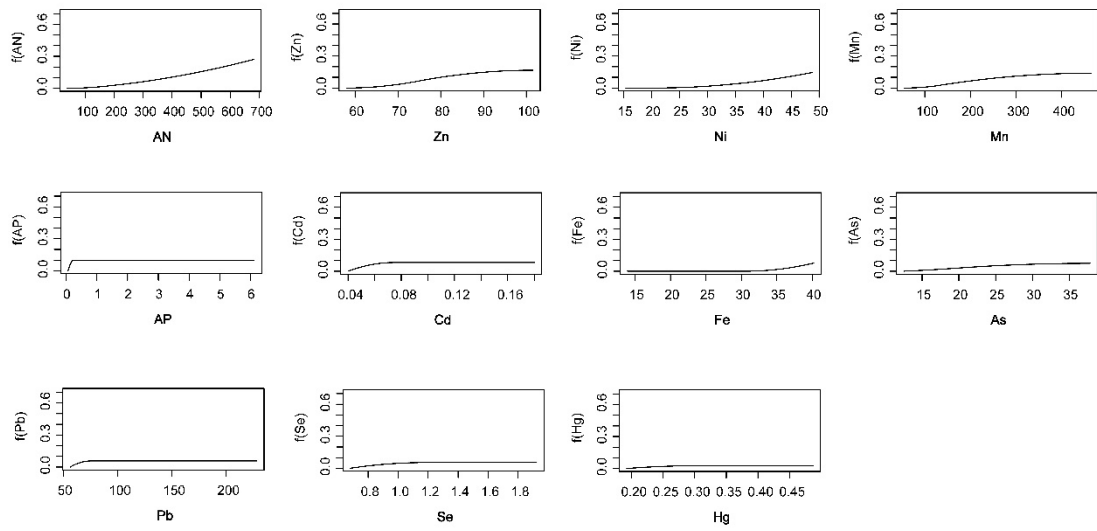

Figure S4. Partial response for 60-100 cm edaphic factors on trees' GDM.

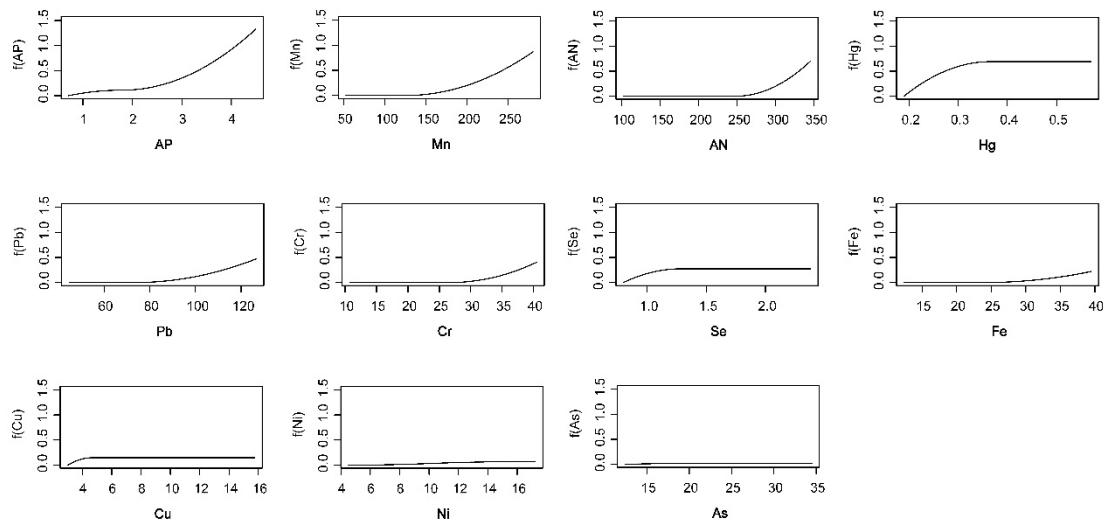

Figure S5. Partial response for 0-20 cm edaphic factors on shrubs' GDM.

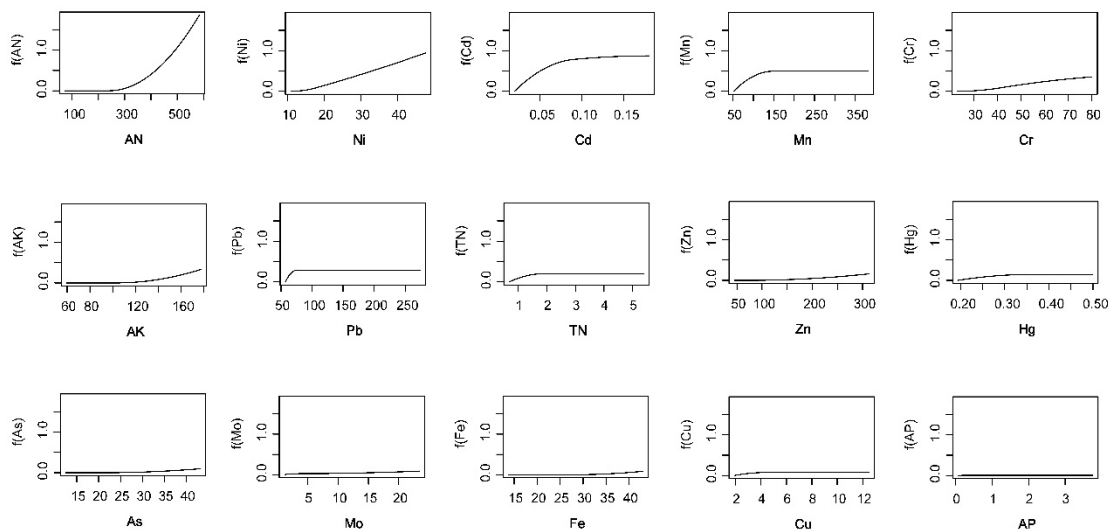

Figure S6. Partial response for 20-40 cm edaphic factors on shrubs' GDM.

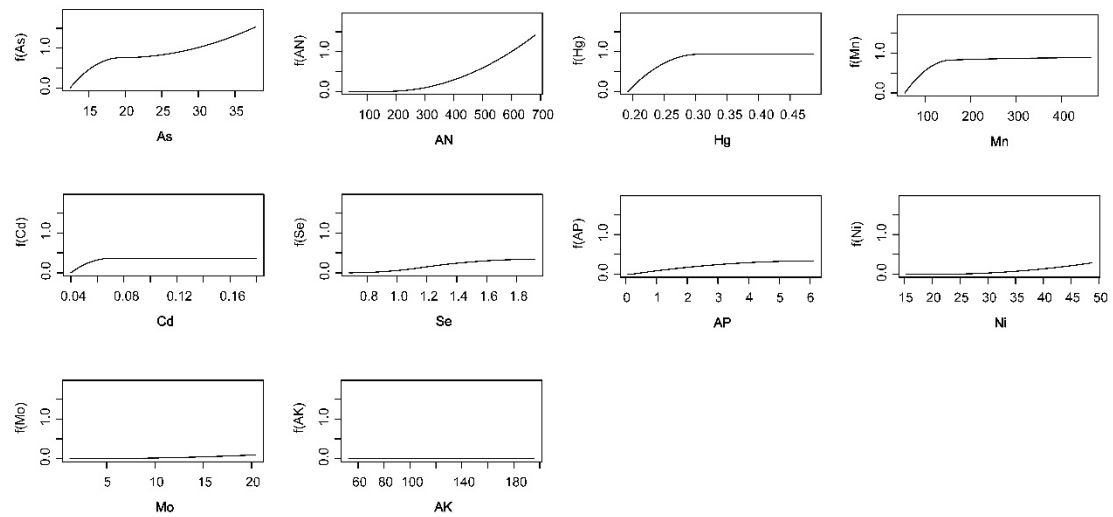

Figure S7. Partial response for 40-60 cm edaphic factors on shrubs' GDM.

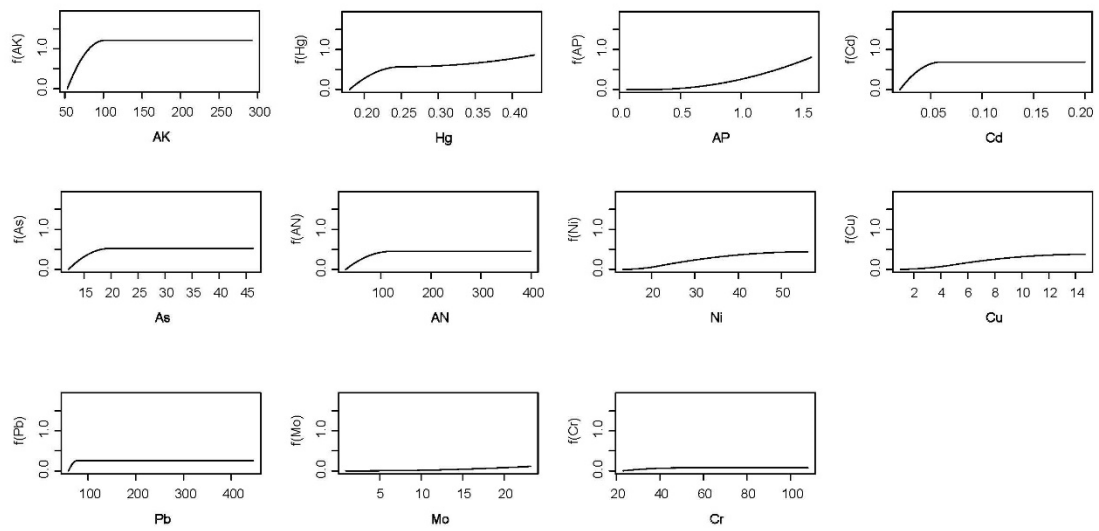

Figure S8. Partial response for 60-100 cm edaphic factors on shrubs' GDM.

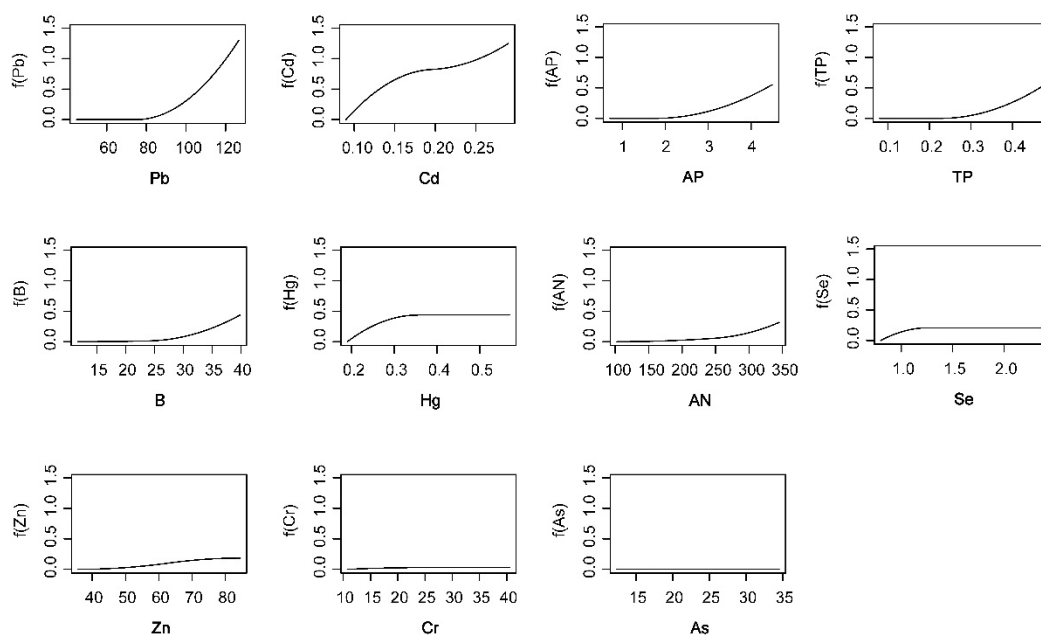

Figure S9. Partial response for 0-20 cm edaphic factors on herbs' GDM.

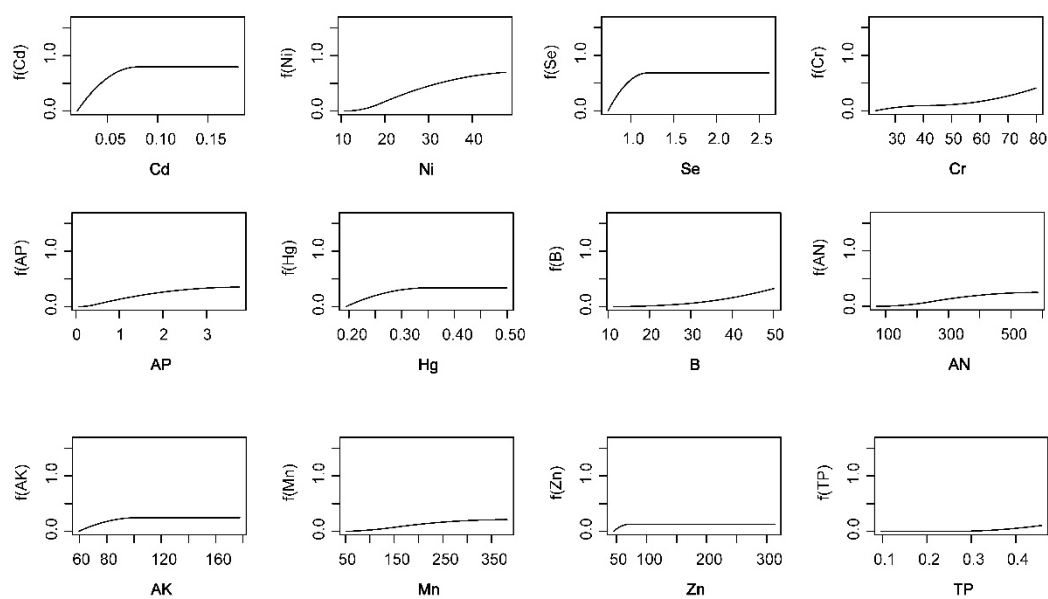

Figure S10. Partial response for 20-40 cm edaphic factors on herbs' GDM.

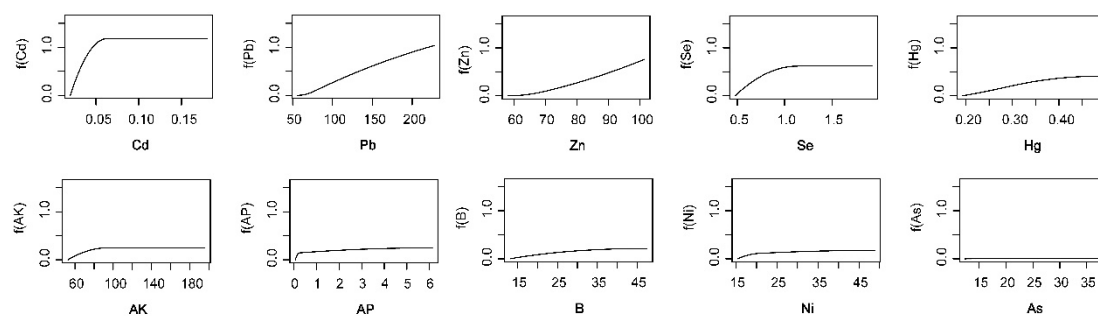

Figure S11. Partial response for 40-60 cm edaphic factors on herbs' GDM.

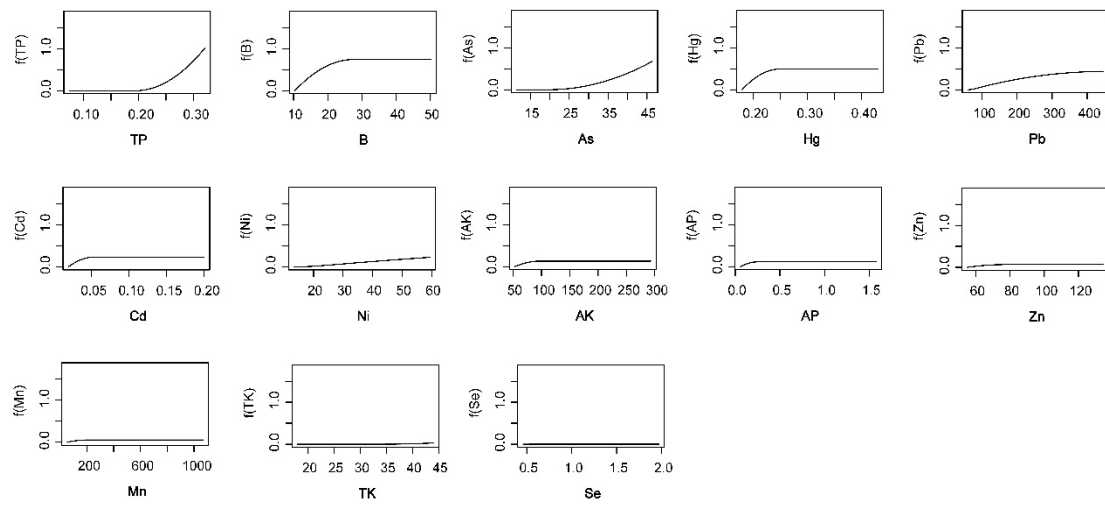

Figure S12. Partial response for 60-100 cm edaphic factors on herbs' GDM.
